# Supplementary material for: Baseline clinical characteristics of predicted structural and pain progressors in the IMI-APPROACH knee OA cohort
Source: HighWire-hosted journal article supplement (doi:10.1136/rmdopen-2021-001759), 2021-08-01
Supplement: rmdopen-2021-001759supp001_data_supplement.pdf [file rmdopen-2021-001759supp001_data_supplement.pdf]

**SUPPLEMENTARY FILE**

**Containing:**

Figure S1

Figure S2

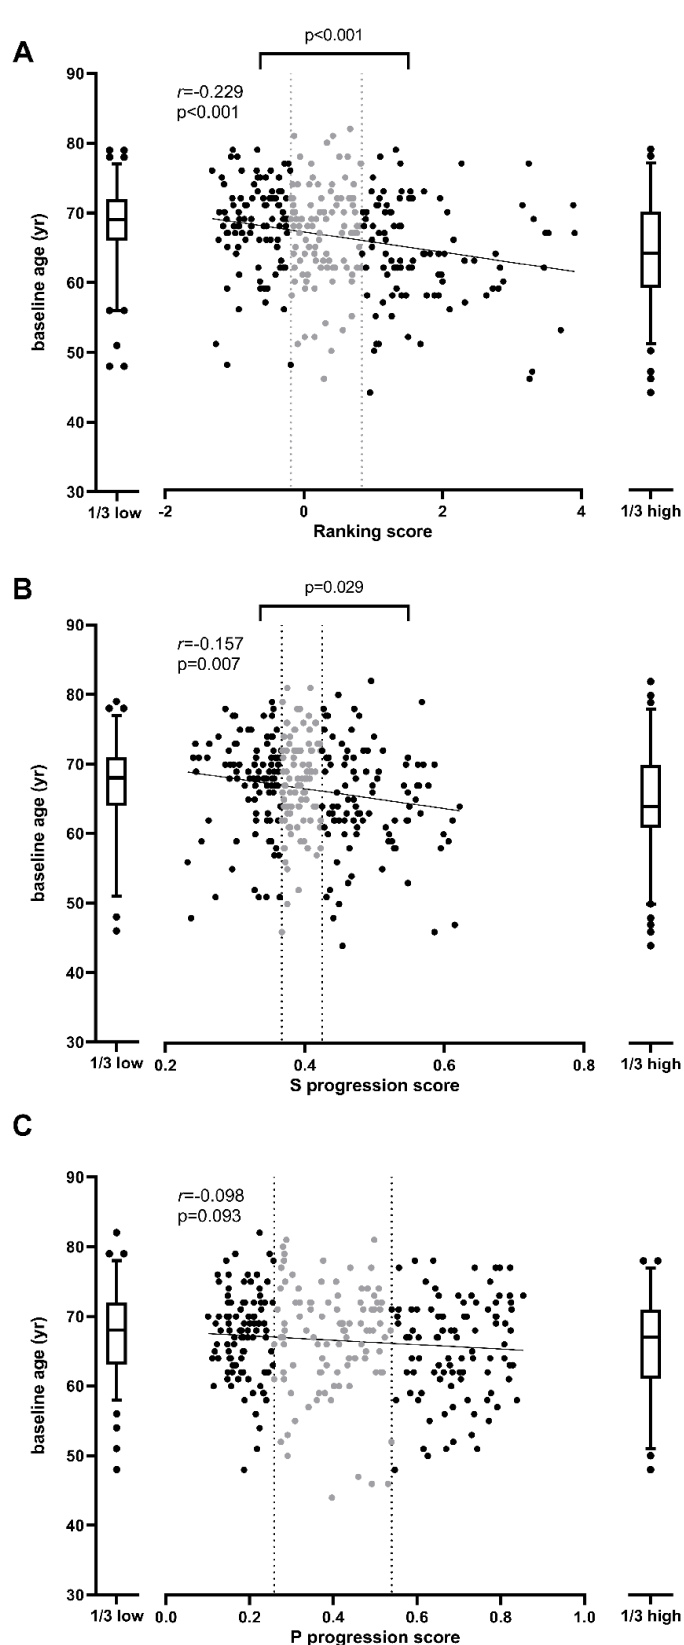

**Fig S1. Relationship between age and progression/ranking scores**

The middle panels of each plot show correlation between age and ranking score (A), S progression score (B), and P progression score (C). Each dot represents a single participant; dots in grey show the middle tertile of the score. Left and right boxplots show the score distribution (median value with 95% confidential intervals) of the participants in the lowest (left) and highest (right) tertile of ranking score (A), S progression score (B), and P progression score (C).

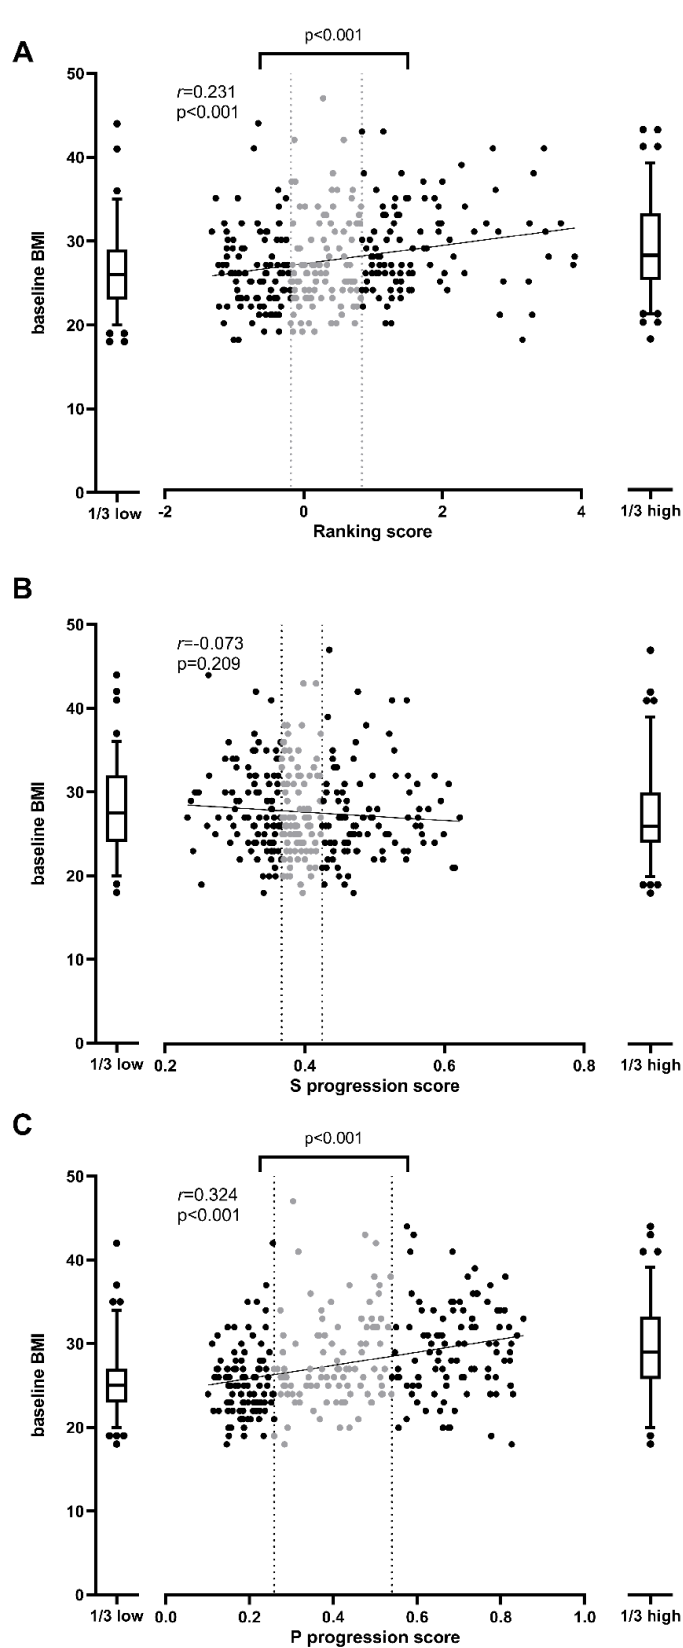

**Fig S2. Relationship between BMI and progression/ranking scores**

The middle panels of each plot show correlation between BMI and ranking score (A), S progression score (B), and P progression score (C). Each dot represents a single participant; dots in grey show the middle tertile of the score. Left and right boxplots show the score distribution (median value with 95% confidential intervals) of the participants in the lowest (left) and highest (right) tertile of ranking score (A), S progression score (B), and P progression score (C).
